# Supplementary material
Source: PubMed Central journal article supplement (PMC4429716)
Supplement: supp_mol.114.097477_RevisedSupplemental_97477.pdf [file supp_mol.114.097477_RevisedSupplemental_97477.pdf]

**SUPPLEMENTAL DATA**

*Article title:* **Dual Targeting of the Androgen Receptor and Hypoxia-inducible Factor 1 $\alpha$  Pathways Synergistically Inhibits Castration-Resistant Prostate Cancer Cells**

*Authors:* Elena V. Fernandez, Kelie M. Reece, Ariel M. Ley, Sarah M. Troutman, Tristan M. Sissung, Douglas K. Price, Cindy H. Chau, and William D. Figg

*Journal Title:* Molecular Pharmacology

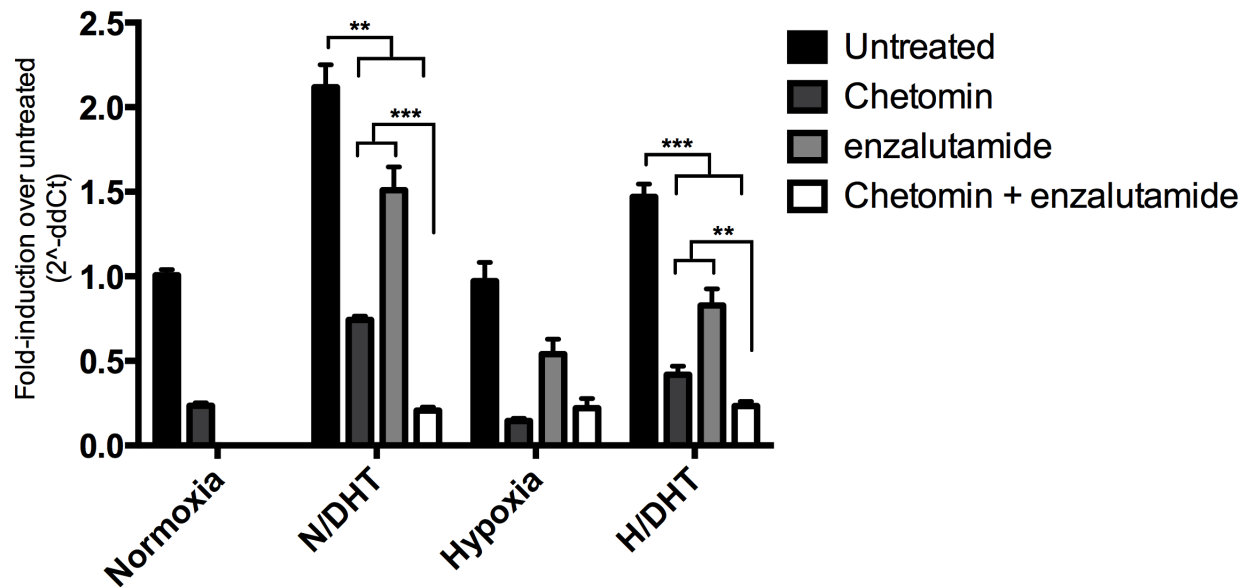

**Supplementary Figure 1.** Effects of chetomin and enzalutamide on *KLK3* in 22Rv1 cells. 22Rv1 cells were cultured in the presence or absence of DHT (1 nM) under normoxic (N) or hypoxic (150  $\mu$ M CoCl<sub>2</sub>) conditions for 18 h. Total RNA was extracted and qPCR analyses were performed for target gene, *KLK3*. Relative mRNA levels of each target gene expression are normalized by  $\beta$ -actin expression, and the results are indicated as fold change from those in the absence of DHT in normoxia. The result is representative of three independent experiments. \*\* $P < 0.01$ , \*\*\* $P < 0.001$  on Figure.

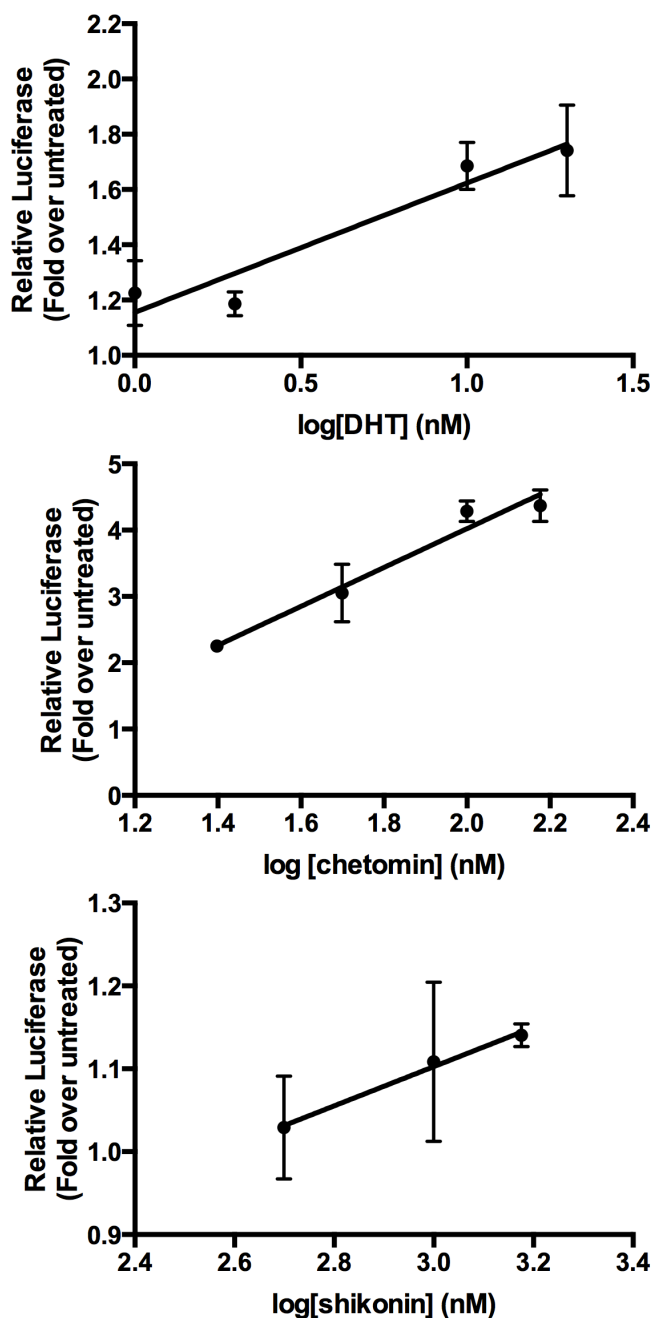

**Supplementary Figure 2.** Reporter gene assay showing DHT and HIF-1 $\alpha$  inhibitors increasing AR transactivation. LNCaP or 22Rv1 cells were co-transfected with the ARE-luciferase construct and the pRL-TK construct, and the activity of the firefly luciferase was normalized by that of the *Renilla* luciferase. (A) DHT ((ARE-luc fold-change)/log[nM] = 0.47,  $R^2=0.92$ ,  $P=0.042$ ); (B) chetomin ((ARE-luc fold-change)/log[nM] = 2.93,  $R^2=0.97$ ,  $P=0.017$ ); (C) shikonin ((ARE-luc fold-change)/log[nM] = 0.24,  $R^2=0.99$ ,  $P=0.057$ ).

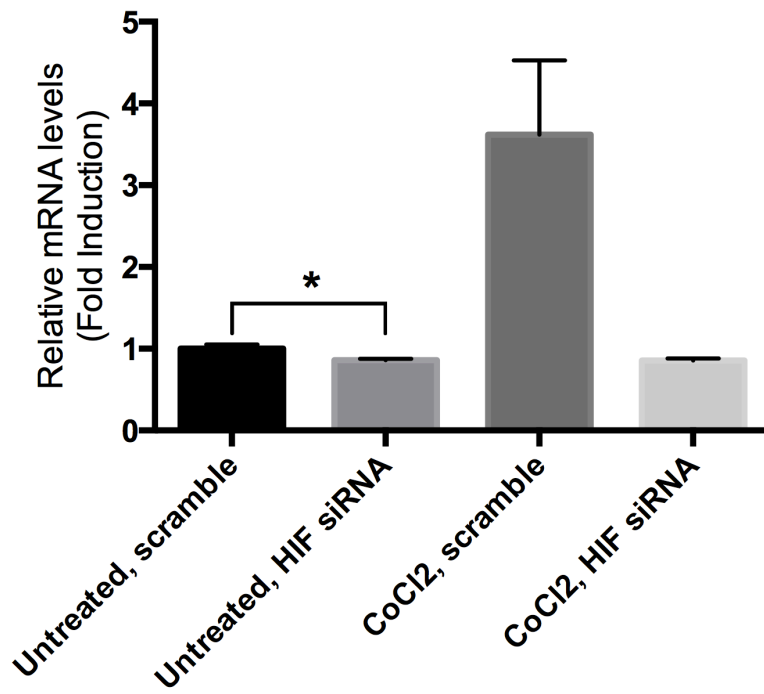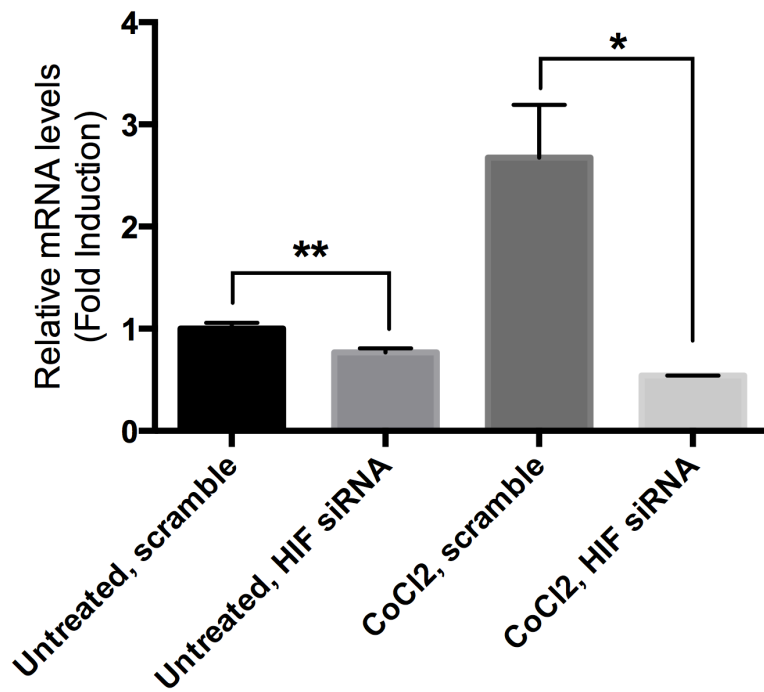

**Supplementary Figure 3.** HIF-1 $\alpha$  siRNA reduces transcription of two HIF-1 $\alpha$  targets: (A) ENO1 and (B) LDHA. \* $P$ <0.05, \*\* $P$ <0.01 on Figure.
